# Supplementary material for: Unveiling the transformation of CoNi hydroxides to CoNiFe layered double hydroxides with implications for electron modulation in one-step coprecipitation for efficient oxygen evolution electrocatalysis
Source: Royal Society of Chemistry journal article supplement (doi:10.1039/d5nr02321a), 2025-01-01
Supplement: d5nr02321a1.pdf [file d5nr02321a1.pdf]

Supplementary Information (SI) for Nanoscale.  
This journal is © The Royal Society of Chemistry 2025

### **Supplementary information (SI)**

## **Unveiling the Transformation of CoNi Hydroxides to CoNiFe Layered Double Hydroxides with an Implications of Electron Modulation in One step Coprecipitation for Efficient Oxygen Evolution Electrocatalysis†**

Jony Saha\* and Firdosh Alam Molla

Department of Applied Chemistry, Maulana Abul Kalam Azad University of Technology  
West Bengal-741249

Email: jonysaha85@gmail.com

| Content                                                            | Page    |
|--------------------------------------------------------------------|---------|
| Chemicals, synthesis, characterization and electrochemical methods | S2–S4   |
| Photograph and UV-visible spectra of the filtrate                  | S5      |
| ICP-OES analysis                                                   | S6      |
| FTIR and N <sub>2</sub> sorption study                             | S7-S8   |
| Comparison of binding energy of XPS analysis                       | S9      |
| Electrochemical analyses                                           | S10-S14 |
| Randel equivalent circuit                                          | S15     |
| Post OER characterization                                          | S16     |
| Capacitance study                                                  | S17     |
| Comparison of electrocatalytic activity                            | S18     |
| Post OER characterization                                          | S19-S21 |
| Zero field cooling temperature dependent magnetic susceptibility   | S22-S23 |
| XPS and Raman analysis                                             | S24-S25 |
| Mott–Schottky plots                                                | S26     |
| Comparison of different synthesis routes                           | S27     |
| References                                                         | S28     |

### Chemical

Nickel nitrate hexahydrate ( $\text{Ni}(\text{NO}_3)_2 \cdot 6\text{H}_2\text{O}$ ), cobalt chloride hexahydrate ( $\text{CoCl}_2 \cdot 6\text{H}_2\text{O}$ ), ferric chloride ( $\text{FeCl}_3$ ) and nafion perfluorinated resin solution were purchased from Sigma- Aldrich Pvt.Ltd. Sodium hydroxides ( $\text{NaOH}$ ), sodium carbonate ( $\text{Na}_2\text{CO}_3$ ), potassium bromide ( $\text{KBr}$ ) and potassium hydroxide ( $\text{KOH}$ ) were supplied by Avra Synthesis Pvt. Ltd. Nitric acid ( $\text{HNO}_3$ ), ethanol and isopropanol were bought from Merck Chemicals Pvt. Ltd. Double distilled water was used throughout the study.

### Experiments:

#### Synthesis of CoNiFeLDH:

In the synthesis of CoNiFeLDH, two sets of solution were prepared. Firstly, the Set -A solution was prepared with 0.70 gm of  $\text{NaOH}$  and 0.60 gm of  $\text{Na}_2\text{CO}_3$  in 10 ml of double distilled water. The synthesis of Set B solution was prepared by dissolving 0.60 gm of  $\text{Ni}(\text{NO}_3)_2 \cdot 6\text{H}_2\text{O}$ , 1.5 gm of  $\text{CoCl}_2 \cdot 6\text{H}_2\text{O}$  and 1.0 gm of  $\text{FeCl}_3$  in 10 ml double distilled water. Then, the Set-A and Set-B solutions were added dropwise to 20 ml double distilled water and stirred the solution at  $\text{pH}=9$  for 24 h. Afterward, the filtration was carried out and the precipitate was washed with water and ethanol. Then the filtered residue was dried in hot air oven for 12h at  $50^\circ\text{C}$ .

#### Synthesis of CoNi hydroxide:

In the synthesis, 0.70 gm of  $\text{NaOH}$  and 0.60 gm of  $\text{Na}_2\text{CO}_3$  were added to 10 ml of double distilled water, labelled as Set-A. Then another set of solutions was prepared, namely Set-B. In Set B, 0.60 gm of  $\text{Ni}(\text{NO}_3)_2 \cdot 6\text{H}_2\text{O}$  and 1.5 gm of  $\text{CoCl}_2 \cdot 6\text{H}_2\text{O}$  were dissolved in 10 ml double distilled water. Afterwards both the set of solutions were added dropwise to 20 ml of double distilled water in stirring condition at  $\text{pH}=9$  for 24 h. The precipitation obtained from the solution was filtered off and washed with water and ethanol. Finally, the filtered residue was dried in hot air at  $50^\circ\text{C}$  for 12h.

### Characterisation:

Fourier transform infra-red (FTIR) spectra of CoNi hydroxide and CoNiFeLDH was carried out using Shimadzu FTIR spectrometer. To analyse, samples were grinded with  $\text{KBr}$  to make a pellet and recorded the spectra in  $4000-400\text{ cm}^{-1}$  range with a resolution of  $4\text{ cm}^{-1}$  in transmission mode. X-ray diffraction of the materials was analysed with Bruker D8 Advance diffractometer by  $\text{Cu K}\alpha$  radiation of wavelength of  $1.5405\text{\AA}$  operating 45 kV and 200 mA. The Raman spectra were performed on a Confocal Photoluminescence Raman Spectro microscope (Model: WITec Alpha 300 R) under an excitation of 532 nm laser light with the power of 0.20 mW. For quantitative analysis, an inductively coupled plasma optical emission spectroscopy (ICP-OES) with Perkin Elmer -Avio 200 was used to estimate the number of moles of Ni, Co and Fe in the respective samples. In the analysis, a known amount of CoNiLDH and CoNiFeLDH was heat-treated separately and transfer the residue in two different beakers to dissolve in

10% HNO<sub>3</sub> solution for ICP-OES analysis in Perkin Elmer Avio 200. N<sub>2</sub> adsorption desorption isotherm was carried out at -196 °C before degassing the samples at 120 °C for 4h under a vacuum of 10<sup>-2</sup> Quantachrome NovaWin surface area and pore size analyser. A multipoint Brunauer -Emmett-Teller (BET) and Barrett -Joyner -Helenda method were followed to estimate pore size distribution and surface area of the samples. For TEM studies, powder samples were dispersed in ethanol and placed one drop on the carbon coated Cu grid to record image and elemental analysis using JEOL-JEM F200 electron microscope with an accelerating voltage of 200 kV. X-ray photoelectron spectroscopy (XPS) of the samples was carried out using Thermofisher Nexsa with an Al K $\alpha$  X-ray monochromatic source (h $\nu$  = 1486.6 eV). Zero field cooling Temperature (ZFC-T) dependent magnetic susceptibility was carried out in 10-300 K using DynaCool (Model: PM-S9).

Electrochemical analysis:

The oxygen evolution reaction with the characterised materials was carried out using electrochemical workstation, Kanopy Tech (Model: PGLyte 1.0). In the experiment three electrodes configuration was used using reference electrode of Ag/AgCl in saturated KCl solution, Pt wire as a counter electrode and glassy carbon as working electrode (electrode diameter = 3 mm area, 0.07 cm<sup>2</sup>). Prior to the electrochemical analysis, the synthesised materials were deposited as catalyst ink on glassy carbon electrodes to make it working electrode for the electrochemical cell. Accordingly, the catalyst ink was prepared by mixing 1.2 mg of the sample, 250  $\mu$ L of distilled water-isopropanol (v/v=3:1) and 12.5  $\mu$ L of nafion perfluorinated resin solution followed by sonication for 5 min to make well disperse ink. In the next step, glassy carbon electrode was polished with the alumina powder of 0.3-micron particle size, and 1  $\mu$ L of the catalyst ink was deposited on the polished surface of glassy carbon. The glassy carbon electrode was dried at 50 °C for 30 min to set up in electrochemical cell with the Ag/AgCl reference electrode and Pt wire counter electrode in 1M KOH electrolyte solution. Linear sweep voltammogram (LSV) was recorded from 0 to 1 V region at 2mV/sec scan rate with respect to Ag/AgCl potential. The potential obtained with respect to Ag/AgCl electrode was converted to reversible hydrogen electrode (RHE) following,  $E(\text{RHE}) = E(\text{Ag/AgCl}) + 0.196 + 0.059 \text{ pH}$ , considering the contribution pH of the electrolyte solution in the electrochemical analysis. The data obtained in the electrochemical analysis was reported without IR drop correction throughout the study. A constant current electrolysis (Chronopotentiometry) was performed at 10 mA cm<sup>-2</sup> for 12 h. Electrochemical impedance spectroscopy (EIS) was carried with 1 amplitude of 0.005 V in a frequency range of 10<sup>5</sup> to 10<sup>2</sup> Hz. Mass activity, specific activity, turnover frequency (TOF) of the catalysts were calculated following Eqs. S1, S2 and S3, respectively.<sup>1,2</sup>

$$\text{Mass activity} = \frac{j}{m} \quad (\text{S1})$$

$$\text{Specific activity} = \frac{j}{S_{\text{BET}} * m} \quad (\text{S2})$$

$$\text{TOF} = \frac{jN}{4F\Gamma} \quad (\text{S3})$$

The term  $j$ ,  $m$  and  $S_{\text{BET}}$  represent the current density at overpotential ( $\eta$ ) of 350 mV, mass density at the electrode surface and BET surface of the synthesised OER catalyst respectively.  $N$ ,  $F$  and  $\Gamma$  are Avogadro's number, Faraday's constant and surface concentration of the catalyst.

The electrochemically available active sites of the materials were evaluated from the associated integrated charge of  $M^{2+}$  to  $M^{3+}$  redox reaction ( $Q$ ) and  $e$  is the elementary charge ( $1.602 \times 10^{-19}$  C). The equation is as follows:<sup>2</sup>

$$\text{electrochemically available active sites} = Q/e \quad (\text{S4})$$

For the post catalytic characterisations, at first catalyst ink was deposited on FTO coated glass substate (resistivity < 10 Ohms/sq) and then OER electrocatalysis was carried out. Finally, the material was collected from the FTO coated glass substrate for different characterisations.

#### Capacitance study:

Cyclic voltammogram were recorded using three electrode configurations in a potential range of -0.2 to 0.2 V vs Ag/AgCl (non-Faradaic region) at different scan rates ( $v$ ) to determine the areal capacitance, electrochemical active surface area (ECSA). The scan rates of the experiments were 50, 100, 200, 300, 400, 500, 600, 700 mV s<sup>-1</sup>. From CVs, the cathodic ( $i_c$ ) and anodic ( $i_a$ ) charging currents were determined at 0 V potential (vs Ag/ AgCl) at different scan rates (300, 400, 500, 600, 700 mV s<sup>-1</sup>) and the obtained current values were plotted against the scan rates. According to the Eqs S5 and S6 shown below the double layered capacitance ( $C_{\text{dl}}$ ) of the catalyst was calculated from the average of two slopes in current vs. scan rate plots.<sup>3</sup>  $C_{\text{dl}}$  was divided by geometrical surface area (GSA) of the glassy carbon electrode to obtain the areal capacitance. ECSA was estimated by dividing  $C_{\text{dl}}$  with the specific capacitance ( $C_s = 27 \mu\text{F cm}^{-2}$ )<sup>3</sup>

$$i_a = vC_{\text{dl}} \quad (\text{S5})$$

$$i_c = vC_{\text{dl}} \quad (\text{S6})$$

#### Mott-Schottky Analysis

Mott-Schottky measurements were carried out at frequency of 1000 Hz in the voltage range of -0.4 V to -1.4 V vs Ag/ AgCl with amplitude 0.005 V using three electrode configurations. In the Mott-Schottky theory, the space charge capacitance is dependant of on the potential, shown in the Eq S7:<sup>4</sup>

$$1/C_s^2 = 2 / e\epsilon\epsilon_0 N_D (E_{\text{applied}} - E_{\text{FB}} - KT/e) \quad (\text{S7})$$

where  $C_s$  represents the capacitance of the space charge region,  $e$  signifies the electronic charge ( $1.602 \times 10^{-19}$  C),  $\epsilon$  is the dielectric constant ( $\epsilon \sim 3.6$ )<sup>2</sup>,  $\epsilon_0$  being the vacuum permittivity given by  $8.854 \times 10^{-14}$  F cm<sup>-1</sup>,  $E_{\text{applied}}$  and  $E_{\text{FB}}$  are the applied and flat band potentials,  $N_D$  represents charge carrier density,  $k$  and  $T$  are the Boltzmann constant and absolute temperature at 298 K, respectively.

A linear fitting of  $1/C_s^2$  versus V vs Ag/AgCl plot provides a slope which is equal to  $2/(q\epsilon\epsilon_0 N_D)$ . Using obtained slope from the plot a charge carrier concentration was determined from the relation,  $N_D = 2/(q\epsilon\epsilon_0 \times \text{slope})$  for both the catalysts.

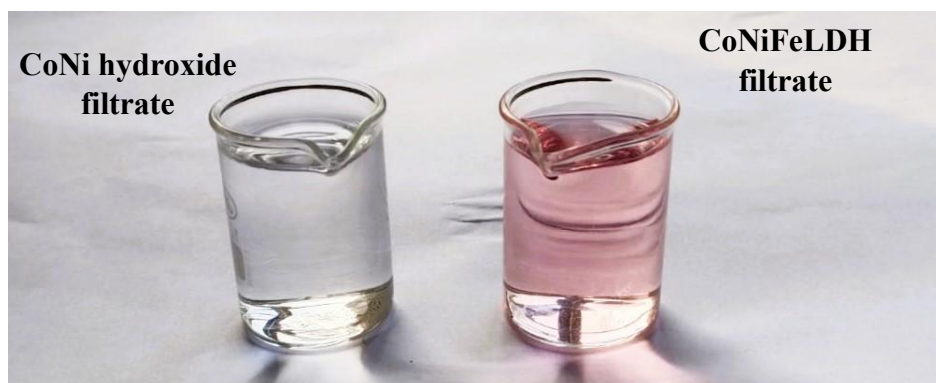

Fig. S1 The photograph of the collected filtrate at the initial stage of filtration.

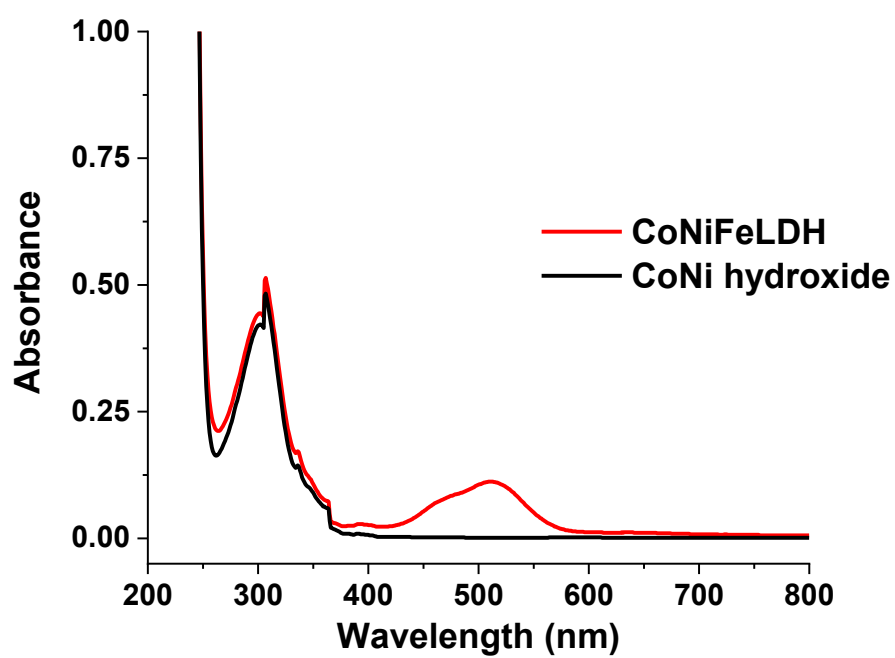

Fig. S2 UV-Vis spectra of filtrate of CoNi hydroxides and CoNiFeLDH at the initial stage of filtration.

## ICP-OES SAMPLE ANALYSIS RESULTS

INSTRUMENT : PERKIN ELMER -AVIO 200

SAMPLE CODE : ASI-160

| SL NO | SAMPLE NAME | Co<br>(mg/l) | Ni<br>(mg/l) | Fe<br>(mg/l) |
|-------|-------------|--------------|--------------|--------------|
| 1     | CN          | 650.9        | 244.4        | -----        |

| SL NO | ELEMENT NAME | Sample CNF (mg/l) |
|-------|--------------|-------------------|
| 1     | Co           | 296.800           |
| 2     | Ni           | 152.700           |
| 3     | Fe           | 636.200           |

Fig. S3 ICP-OES analysis for elemental analysis for CoNi hydroxides (CN) and CoNiFeLDH (CNF). A sample codes of CN and CNF were used for ICP-OES analysis.

Table S1 A comparison of Co:Ni in CoNi hydroxides and Co:Ni:Fe in CoNiFeLDH

| Sample              | Feeding ratio               | ICP-OES analysis           |
|---------------------|-----------------------------|----------------------------|
| CoNi hydroxide (CN) | Co: Ni=1.00:0.30            | Co: Ni=1.00: 0.37          |
| CoNiFe LDH (CNF)    | Co: Ni: Fe= 1.00: 0.30:1.00 | Co:Ni:Fe= 0.45: 0.23: 1.00 |

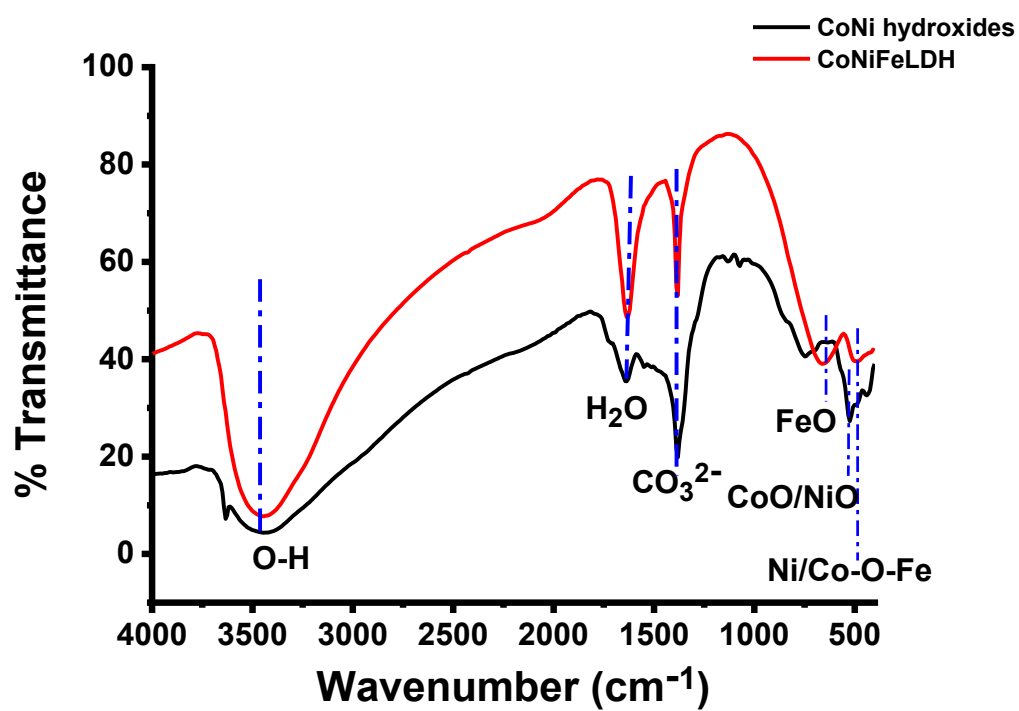

Fig. S4 FTIR spectra of CoNi hydroxides and CoNiFeLDH showing different bond vibrations of carbonates, water molecules and metal hydroxide.

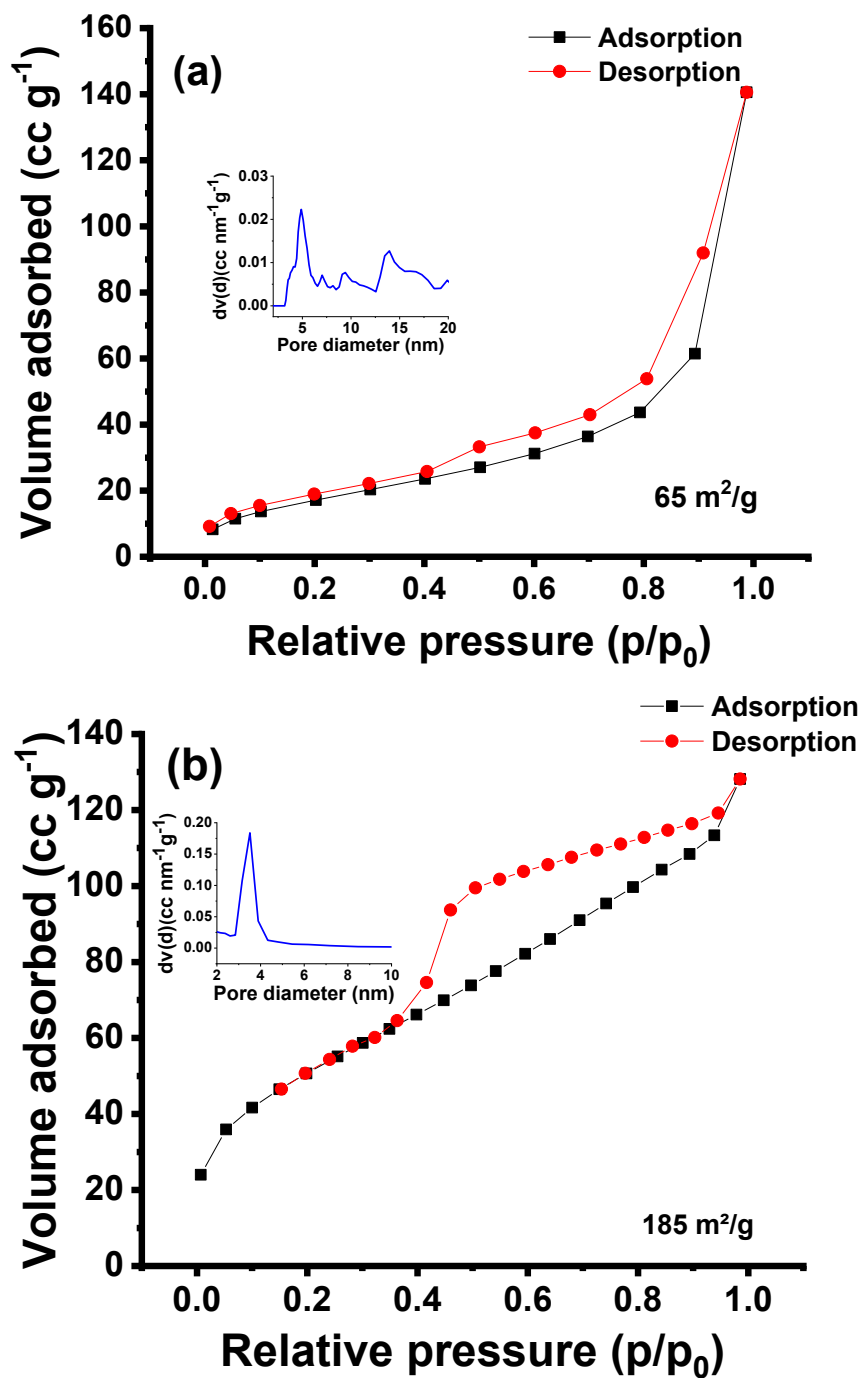

Fig. S5 N<sub>2</sub> adsorption - desorption isotherm and the pore size distribution (inset) of (a) CoNi hydroxides and (b) CoNiFeLDH. The surface area is provided for each case at right side of the respective figure.



Table S2 Comparison of the binding energy of the XPS peaks for Co, Ni, O in CoNi hydroxide and Co, Ni, Fe, O in CoNiFeLDH, with the reported earlier.<sup>5,6</sup>

| Sample         | Deconvoluted Co          | Observed binding energy (eV) | Reported binding energy (eV) |
|----------------|--------------------------|------------------------------|------------------------------|
| CoNi hydroxide | Co <sup>3+</sup> (2p3/2) | 780.8                        | 780.6                        |
|                | Co <sup>2+</sup> (2p3/2) | 782.3                        | 782.3                        |
|                | Co <sup>3+</sup> (2p1/2) | 796.5                        | 796.4                        |
|                | Co <sup>2+</sup> (2p1/2) | 797.7                        | 797.7                        |
|                |                          |                              |                              |
| CoNiFeLDH      | Co <sup>3+</sup> (2p3/2) | 780.7                        | 780.6                        |
|                | Co <sup>2+</sup> (2p3/2) | 782.2                        | 782.3                        |
|                | Co <sup>3+</sup> (2p1/2) | 796.5                        | 796.4                        |
|                | Co <sup>2+</sup> (2p1/2) | 797.7                        | 797.7                        |

| Sample         | Deconvoluted Ni          | Observed binding energy (eV) | Reported binding energy (eV) |
|----------------|--------------------------|------------------------------|------------------------------|
| CoNi hydroxide | Ni <sup>2+</sup> (2p3/2) | 856.1                        | 855.9                        |
|                | Ni <sup>2+</sup> (2p1/2) | 873.6                        | 873.4                        |
|                |                          |                              |                              |
| CoNiFeLDH      | Ni <sup>2+</sup> (2p3/2) | 856.2                        | 855.9                        |
|                | Ni <sup>2+</sup> (2p1/2) | 873.6                        | 873.4                        |

| Sample    | Deconvoluted Fe          | Observed binding energy (eV) | Reported binding energy (eV) |
|-----------|--------------------------|------------------------------|------------------------------|
| CoNiFeLDH | Fe <sup>2+</sup> (2p3/2) | 711.2                        | 711.0                        |
|           | Fe <sup>3+</sup> (2p3/2) | 713.4                        | 713.2                        |
|           | Fe <sup>2+</sup> (2p1/2) | 725.4                        | 724.5                        |

| Sample         | Deconvoluted O    | Observed binding energy (eV) | Reported binding energy (eV) |
|----------------|-------------------|------------------------------|------------------------------|
| CoNi hydroxide | O1s (Lattice O)   | 530.8                        | 529.5                        |
|                | O1s (Adsorbed OH) | 531.5                        | 531.5                        |
|                | Surface O-C=O     | 532.3                        | 532.7                        |
|                |                   |                              |                              |
| CoNiFeLDH      | O1s (Lattice O)   | 531.1                        | 529.5                        |
|                | O1s (Adsorbed OH) | 531.8                        | 531.5                        |
|                | Surface O-C=O     | 532.8                        | 532.7                        |

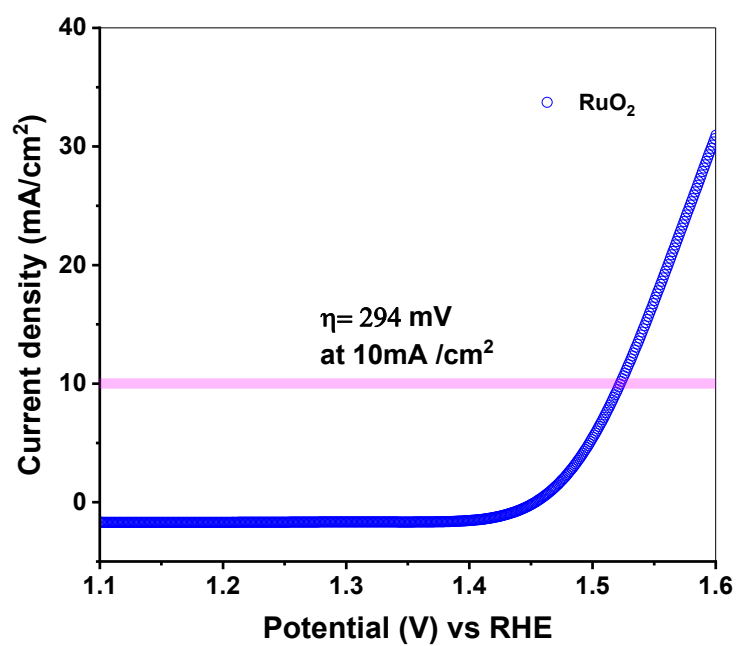

Fig. S6 Linear sweep voltammogram of RuO<sub>2</sub>.

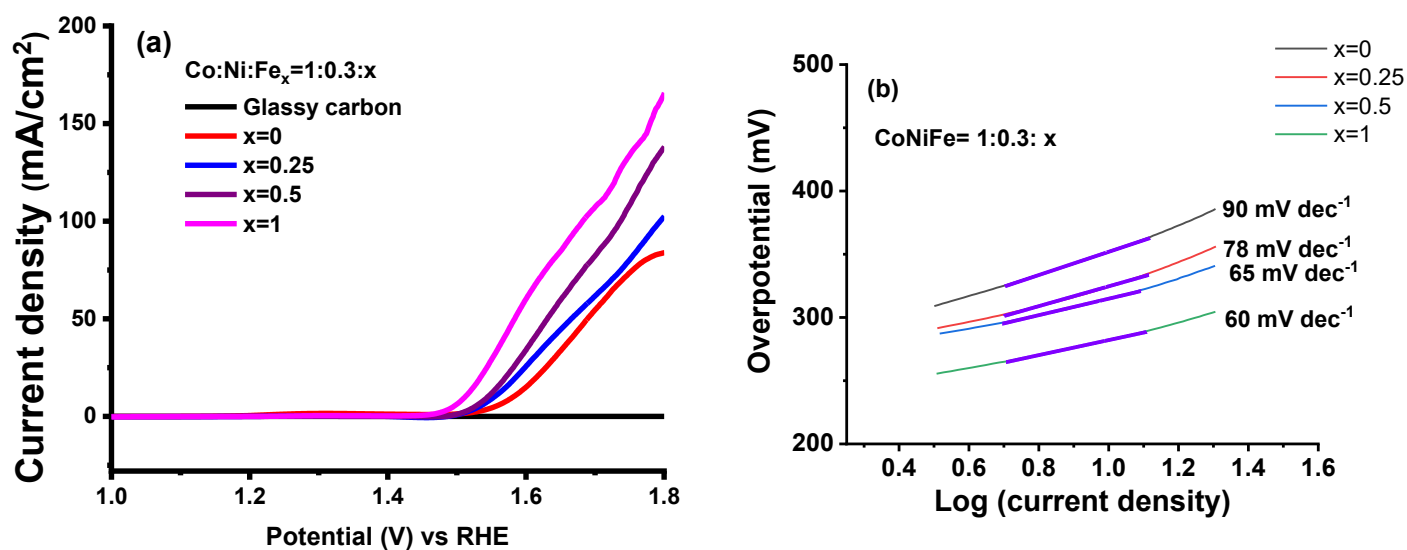

Fig. S7 (a) Linear sweep voltammograms and (b) Tafel plots of CoNiFex (x=0,0.25, 0.5, 1).

Table S3 Comparisons of overpotential, Tafe slope, TOF (s<sup>-1</sup>), mass activity, specific activity of changed iron contents in the synthesis (x=0, 0.25, 0.5, 1).

| Catalysts<br>Co:Ni:Fe=1:0.3:x | Overpotential<br>at 10 mA/cm <sup>2</sup> | Tafel slope<br>(mV dec <sup>-1</sup> ) | TOF<br>(s <sup>-1</sup> ) | Mass activity@<br>η=350 mV (Ag <sup>-1</sup> ) |
|-------------------------------|-------------------------------------------|----------------------------------------|---------------------------|------------------------------------------------|
| x=0(CoNi hydroxide)           | 353 mV                                    | 90                                     | 0.17                      | 148                                            |
| x=0.25                        | 324 mV                                    | 78                                     | 0.55                      | 279                                            |
| x=0.5                         | 314 mV                                    | 65                                     | 1.85                      | 377                                            |
| x=1 (CoNiFeLDH)               | 280 mV                                    | 60                                     | 2.60                      | 737                                            |

## **Determination of Turnover Frequency (TOF) from the Current Density of OER.<sup>2</sup>**

### **Calculation of TOF for CoNi hydroxide: CoNiFex (x=0):**

Current density:  $9.68753 \times 10^{-3} \text{ A/ cm}^2$  at 350 mV overpotential

Area under the curve associated with the of  $\text{M}^{3+}$  to  $\text{M}^{2+}$  from origin =  $0.40472 \times 10^{-3} \text{ AV/ cm}^2$

Total current: =  $0.40472 \times 10^{-3} \text{ A/ cm}^2 \times 0.07 \text{ cm}^2$  (electrode area)

$$= 0.00002813 \text{ AV}$$

Associated charge=  $0.00002813 \text{ AV/} 0.002 \text{ V s}^{-1}$  (scan rate)

$$= 0.0141 \text{ As}$$

$$= 0.0141 \text{ C}$$

The number of electron transferred =  $0.0141 \text{ C/ } (1.602 \times 10^{-19} \text{ C})$

$$= 8.83 \times 10^{16}$$

TOF at 350 mV overpotential:  $(9.68753 \times 10^{-3}) \times (6.022 \times 10^{23}) / (96485 \times 4 \times 8.83 \times 10^{16})$

$$= 0.17 \text{ s}^{-1}$$

### **Calculation of TOF for CoNiFex (x=0.25)**

Current density:  $18.155 \times 10^{-3} \text{ A/ cm}^2$  at 350 mV overpotential

Area under the curve associated with the of  $\text{M}^{3+}$  to  $\text{M}^{2+}$  from origin=  $0.236 \times 10^{-3} \text{ AV/ cm}^2$

Total current: =  $0.236 \times 10^{-3} \text{ A/ cm}^2 \times 0.07 \text{ cm}^2$  (electrode area)

$$= 0.00001652 \text{ AV}$$

Associated charge=  $0.00001652 \text{ AV/} 0.002 \text{ V s}^{-1}$  (scan rate)

$$= 0.00826 \text{ As}$$

$$= 0.00826 \text{ C}$$

The number of electron transferred =  $0.00826 \text{ C / } (1.602 \times 10^{-19} \text{ C})$

$$= 5.15 \times 10^{16}$$

TOF at 350 mV overpotential:  $(18.155 \times 10^{-3}) \times (6.022 \times 10^{23}) / (96485 \times 4 \times 5.15 \times 10^{16})$

$$= 0.55 \text{ s}^{-1}$$

### **Calculation of TOF for CoNiFex (x=0.5)**

Current density:  $24.53 \times 10^{-3} \text{ A/ cm}^2$  at 350 mV overpotential

Area under the curve associated with the of  $\text{M}^{3+}$  to  $\text{M}^{2+}$  from origin=  $0.0944 \times 10^{-3} \text{ AV/ cm}^2$

Total current: =  $0.0944 \times 10^{-3} \text{ A/ cm}^2 \times 0.07 \text{ cm}^2$  (electrode area)

$$= 0.000006608 \text{ AV}$$

Associated charge= 0.000006608 AV/0.002 V s<sup>-1</sup> (scan rate)

$$=0.003304 \text{ As}$$

$$=0.003304 \text{ C}$$

The number of electron transferred = 0.003304 C / (1.602 x 10<sup>-19</sup> C)

$$= 2.06 \times 10^{16}$$

TOF at 350 mV overpotential: (24.53 x 10<sup>-3</sup>) x (6.022 x 10<sup>23</sup>) / (96485 x 4 x 2.06 x 10<sup>16</sup>)

$$=1.85 \text{ s}^{-1}$$

**Calculation TOF for CoNiFeLDH: CoNiFex (x=1):**

Current density: 48.1619 x 10<sup>-3</sup> A/ cm<sup>2</sup> at 350 mV overpotential

Area under the curve associated with the of M<sup>3+</sup> to M<sup>2+</sup> from origin= 0.13214 x 10<sup>-3</sup> AV/ cm<sup>2</sup>

Total current: = 0.13214 x 10<sup>-3</sup> A/ cm<sup>2</sup> x 0.07 cm<sup>2</sup> (electrode area)

$$= 0.0000092498 \text{ AV}$$

Associated charge= 0.0000092498 AV/0.002 V s<sup>-1</sup> (scan rate)

$$=0.004624 \text{ As}$$

$$=0.004624 \text{ C}$$

The number of electron transferred is = 0.004624C C/ (1.602 x 10<sup>-19</sup> C)

$$= 2.886 \times 10^{16}$$

TOF at 350 mV overpotential: (48.1619 x 10<sup>-3</sup>) x (6.022 x 10<sup>23</sup>) / (96485 x 4 x 2.886 x 10<sup>16</sup>)

$$=2.60 \text{ s}^{-1}$$

### **Calculation of number of available active metal sites of CoNiFeLDH in OER<sup>2</sup>**

Current density:  $48.1619 \times 10^{-3} \text{ A/ cm}^2$  at 350 mV overpotential

Area under the curve associated with the of  $\text{M}^{3+}$  to  $\text{M}^{2+}$  from origin =  $0.13214 \times 10^{-3} \text{ AV/ cm}^2$

Total current: =  $0.13214 \times 10^{-3} \text{ A/ cm}^2 \times 0.07 \text{ cm}^2$  (electrode area)

$$= 0.0000092498 \text{ AV}$$

Associated charge =  $0.0000092498 \text{ AV/} 0.002 \text{ V s}^{-1}$  (scan rate)

$$= 0.004624 \text{ As}$$

$$= 0.004624 \text{ C}$$

The number of electron transferred is =  $0.004624 \text{ C/ } (1.602 \times 10^{-19} \text{ C})$

$$= 2.88 \times 10^{16}$$

Since  $\text{M}^{3+}$  to  $\text{M}^{2+}$  change is a single electron transfer reaction, the number of electrons transferred in the process is equal to the number of available active metal sites.

Therefore, number of available active metal sites that involved in the OER electrocatalysis is

$$\mathbf{2.88 \times 10^{16}}$$

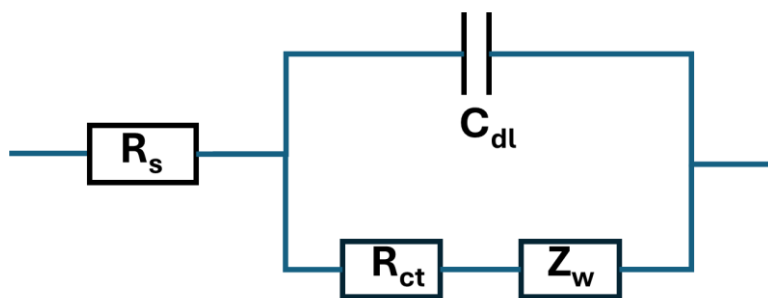

Fig. S8 Randel equivalent circuit;  $R_s$ : electrolyte resistance,  $C_{dl}$ : double layer capacitance,  $R_{ct}$ : charge transfer resistance and  $Z_w$ : Warburg impedance.

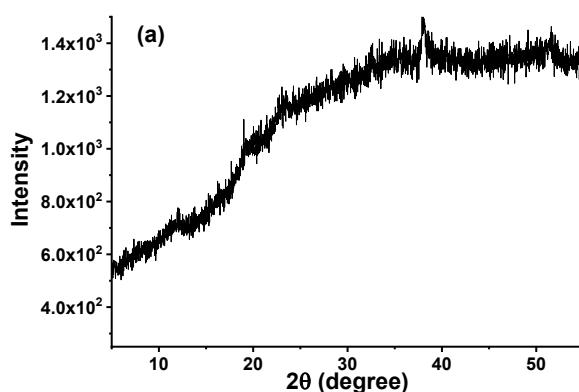

(b) Label: CN # 2  
 Analysis Type: UNKNOWN Analysis started at: 21/08/2025  
 Amount: Final Quantity: Standard DF: 1

| Analyte (Measure Mode)         | Concentration average |
|--------------------------------|-----------------------|
| Ni 221.647 (Aqueous-Axial-iFR) | 40.506 ppm            |
| Co 237.862 (Aqueous-Axial-iFR) | 136.818 ppm           |

Mole ratio of Co:Ni in CoNi hydroxide (CN) = 1.00:0.33

Fig. S9a,b XRD and ICP-OES analysis of CoNi hydroxide after OER electrocatalysis.

It was noticed that the semi crystalline characteristics and the quantitative Co and Ni mole ratio remained unaltered in ICP-OES after OER electrocatalysis. So, the possibility of structural mutation in this case was precluded. Therefore, the disintegration of the material from electrode surface became evident in the stability test. This has been reasonable in context of continuous oxygen bubbling in OER that brought mechanical stress to the material inducing disintegration and resulted in the decrease of OER activity.



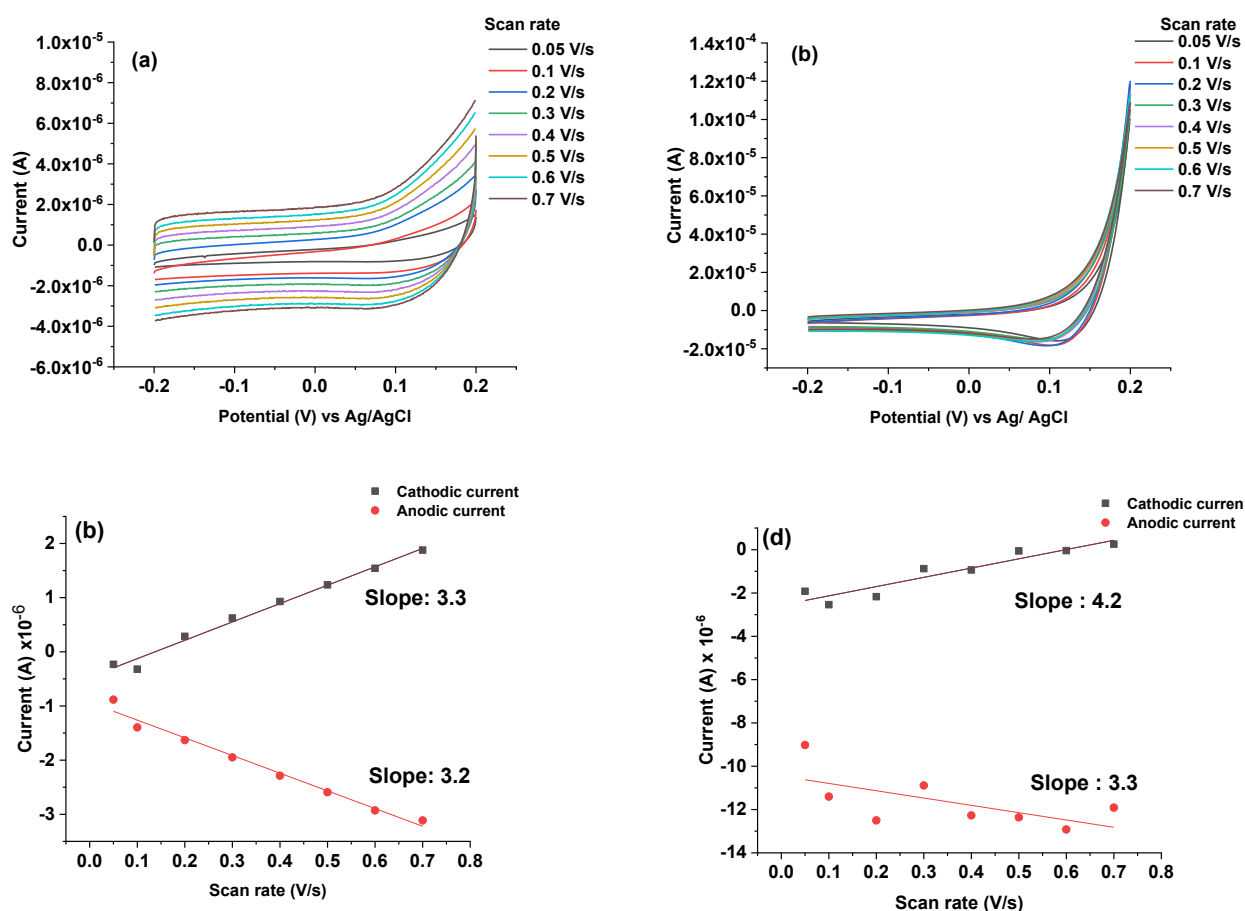

Fig. S10 Cyclic voltammograms of (a) CoNiFeLDH and (b) CoNi hydroxide recorded at different scan rates of 50, 100, 200, 300, 400, 500, 600, 700  $\text{mV s}^{-1}$  (c,d) plots of cathodic and anodic currents at 0 V in different scan rates for CoNiFeLDH and CoNi hydroxide, respectively.

Table S4 Double layer capacitance, Areal capacitance, electrochemical active surface area, charge transfer resistance of the catalyst.

| Catalyst       | Double layer capacitance ( $C_{dl}$ , F) | Areal capacitance ( $\text{F}/\text{cm}^2$ ) | ECSA ( $\text{cm}^2$ ) | Charge transfer resistance (ohm) |
|----------------|------------------------------------------|----------------------------------------------|------------------------|----------------------------------|
| CoNi hydroxide | $3.82 \times 10^{-6}$                    | $54.65 \times 10^{-6}$                       | 0.14                   | 33                               |
| CoNiFeLDH      | $3.32 \times 10^{-6}$                    | $47.50 \times 10^{-6}$                       | 0.12                   | 17                               |

Table S5 Comparisons of OER activity of Co, Ni, Fe based LDH catalysts with the reported earlier.

| Sl No                                                             | Co, Ni and Fe based LDH electrocatalyst                   | Catalyst loading (mg cm <sup>-2</sup> ) | $\eta$ @10 mA cm <sup>-2</sup> (mV) | Tafel slope (mV dec <sup>-1</sup> ) | Ref.                                                         |
|-------------------------------------------------------------------|-----------------------------------------------------------|-----------------------------------------|-------------------------------------|-------------------------------------|--------------------------------------------------------------|
| 1.                                                                | <i>CoNiFeLDH</i>                                          | 0.06                                    | 280                                 | 60                                  | <i>Our work</i>                                              |
| 2.                                                                | NiFe LDH nanosheets anchored on cobalt nanocrystal        | 0.4                                     | 282                                 | 64                                  | <i>ACS Appl.NanoMater.</i> ,2022, <b>5</b> , 13047           |
| 3.                                                                | Co-Ni-Fe LDH                                              | 0.14                                    | 322                                 | 41.8                                | <i>J. Colloid Interface Sci.</i> , 2025, <b>678</b> , 924    |
| 4.                                                                | Ni-Co-Fe hydr(oxy)oxide@Ni-Co LDH                         | 0.33                                    | 278                                 | 49.7                                | <i>Angew. Chem. Int. Ed.</i> 2022, <b>61</b> , e202213049    |
| 5.                                                                | Trimetallic NiCoFe-LDH                                    | 2.8                                     | 277                                 | 68.8                                | <i>ACS Sustain. Chem. Eng.</i> 2022, <b>10</b> , 14693       |
| 6.                                                                | FeCoNi LDH                                                | 0.25                                    | 269                                 | 42.3                                | <i>Adv. Energy Mater.</i> 2021, <b>23</b> , 2102141          |
| 7.                                                                | NiCoFe-LDH nanosheets                                     | 18.8                                    | 288                                 | 92                                  | <i>ACS Catal.</i> , 2020, <b>10</b> , 5179                   |
| 8.                                                                | Ternary NiCoFe-LDH hollow polyhedrons                     | 1.0                                     | 276                                 | 56                                  | <i>J. Energy Chem.</i> 2020, <b>43</b> , 104                 |
| 9.                                                                | NiCoFe-LDH/N-doped graphene oxide                         | 0.28                                    | 317                                 | 56.8                                | <i>Adv. Energy Mater.</i> 2017, <b>8</b> , 1701905           |
| 10                                                                | CoNiFe LDH/GC                                             | 0.20                                    | 291                                 | 59                                  | <i>ACS Appl. Energy Mater.</i> , 2018, <b>1</b> , 4998       |
| 11                                                                | <i>CoNiFe subacetate nanoprism</i>                        | 0.4                                     | 292                                 | 75.6                                | <i>New J. Chem.</i> 2023, <b>47</b> , 18532                  |
| 12.                                                               | <i>CoCuFe LDH/graphene</i>                                | 0.25                                    | 350                                 | 62.6                                | <i>ACS Appl. Mater. Interfaces</i> , 2024, <b>16</b> , 50846 |
| <i>Comparison of turn over frequency (TOF) and mass activity:</i> |                                                           |                                         |                                     |                                     |                                                              |
|                                                                   | LDH Catalyst                                              | TOF (s <sup>-1</sup> )                  | Mass activity (Ag <sup>-1</sup> )   | Electrolyte                         | Ref.                                                         |
| 1.                                                                | <i>CoNiFeLDH</i>                                          | 2.6 @350 mV                             | 730 @350 mV                         | 1M KOH                              | <i>Our work</i>                                              |
| 2.                                                                | CoFe-LDH                                                  | 4.22 @300 mV                            | 559.2 @350 mV                       | 1M KOH                              | <i>ACS Appl. Nano Mater.</i> , 2024, <b>7</b> , 9532         |
| 3.                                                                | NiFeLDH/OC                                                | 1.05 @300 mV                            | 528 @350 mV                         | 1M KOH                              | <i>Chem. Commun.</i> 2020, <b>56</b> , 8770                  |
| 4.                                                                | Co <sub>3</sub> Fe <sub>1</sub> LDH/rGO/NF                | 6.0 * 10 <sup>-2</sup> @ 300 mV         | 26.02 @ 400 mV                      | 1M KOH                              | <i>Int. J. Hydrog. Energy.</i> , 2021, <b>46</b> , 27529     |
| 5.                                                                | Co <sub>0.4</sub> Fe <sub>0.6</sub> LDH/g-CN <sub>x</sub> | 2.5 * 10 <sup>-1</sup> @ 350 mV         | 1353 @ 340 mV                       | 1 M KOH                             | <i>ACS Appl. Energy Mater.</i> , 2018, <b>1</b> , 1200       |

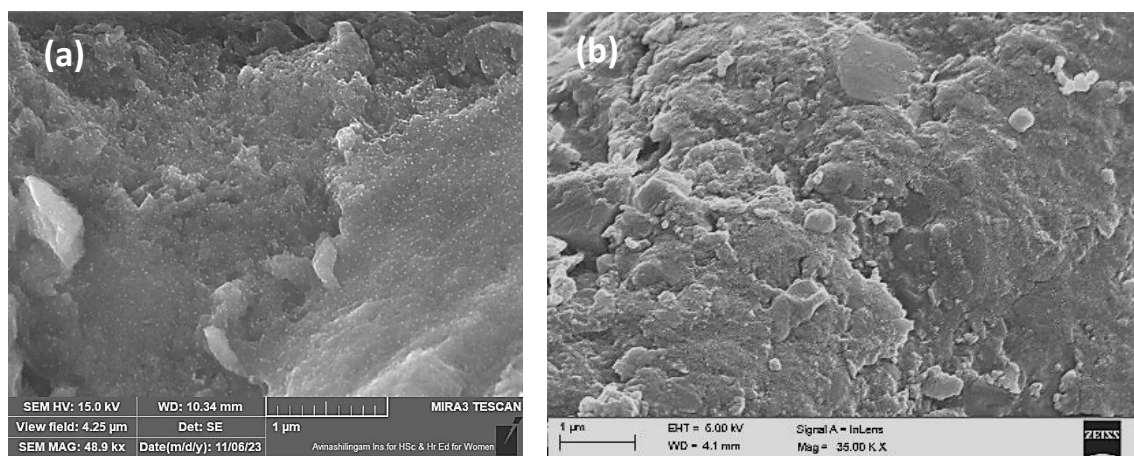

Fig. S11 SEM analysis of CoNiFeLDH (a) before and (b) after electrocatalysis.

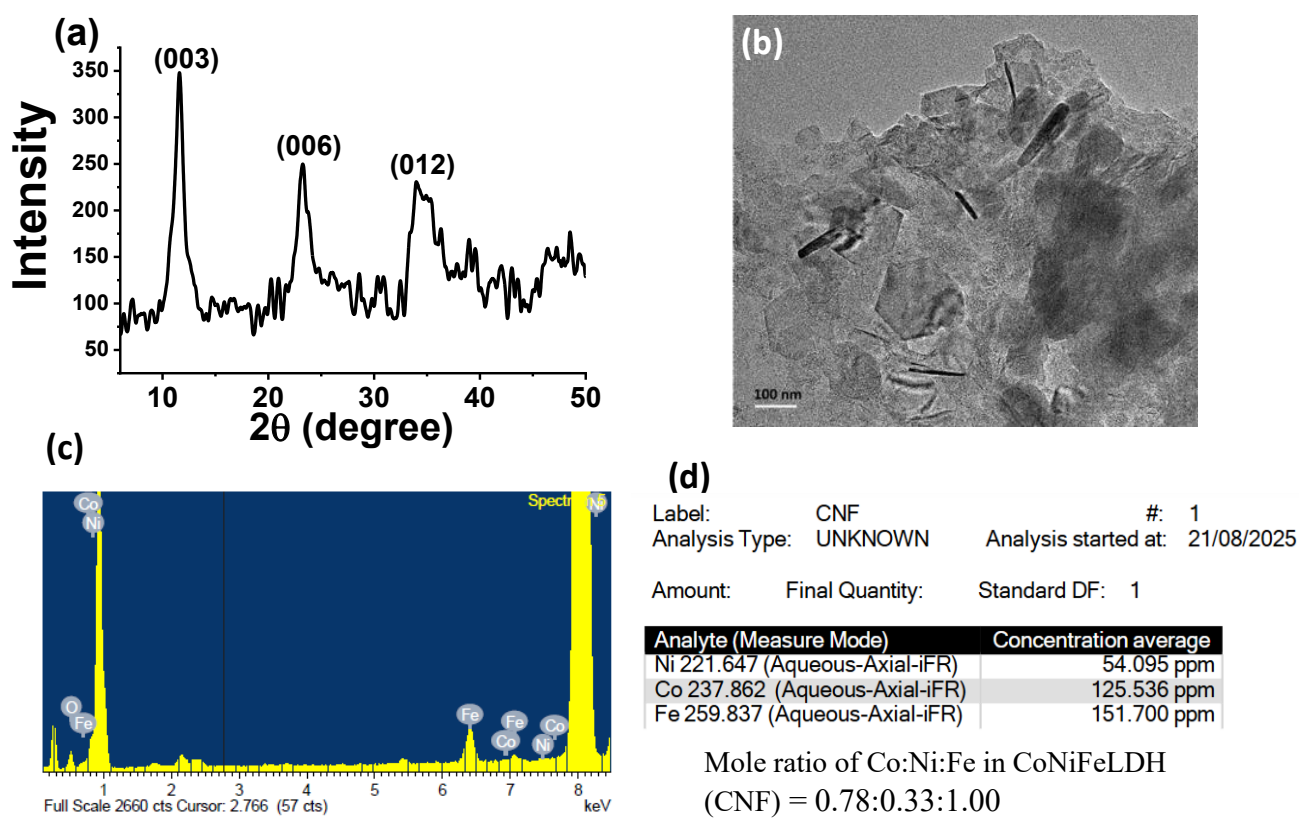

Fig. S12 (a) XRD, (b, c) HRTEM, EDS and (d) ICP-OES of CoNiFeLDH after electrocatalysis.

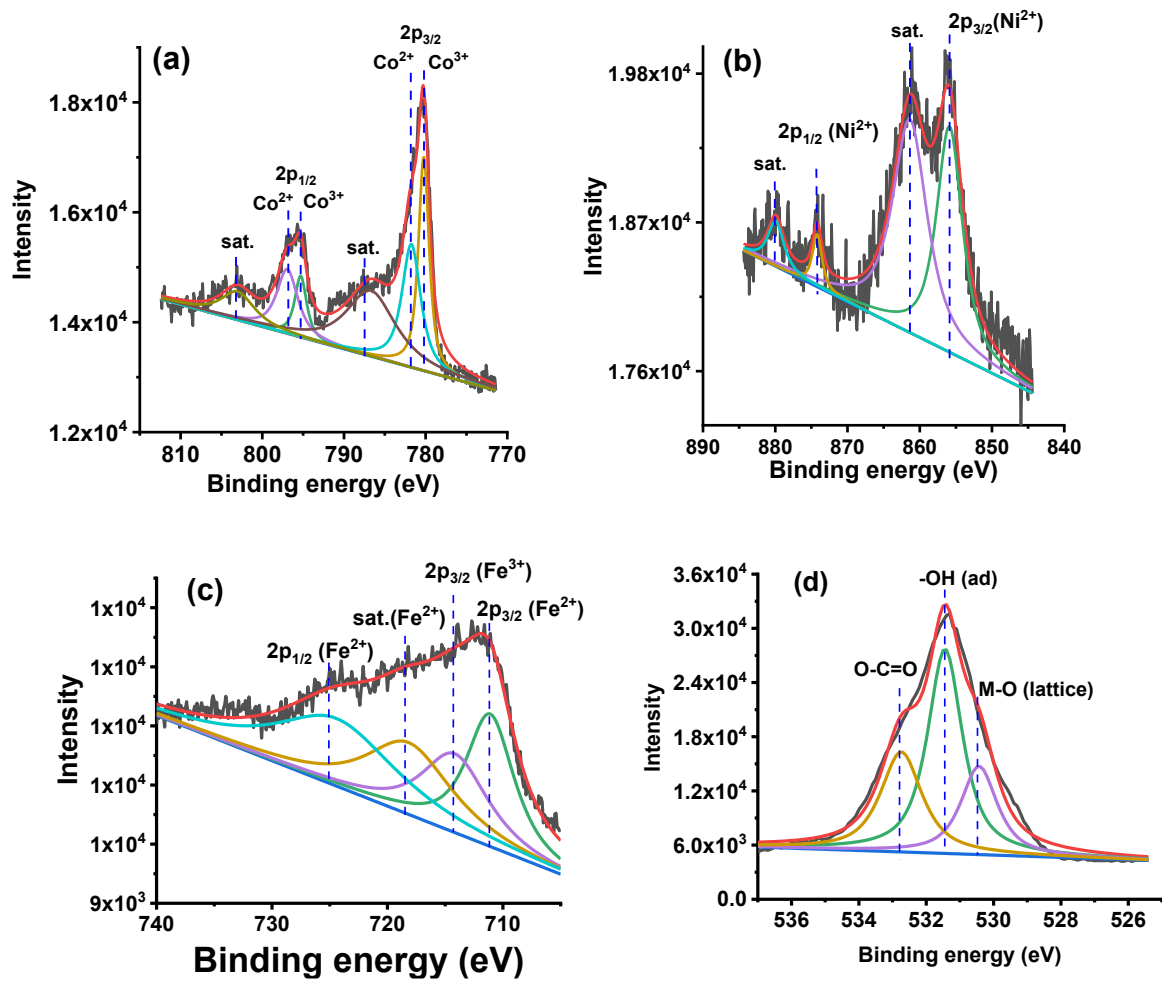

Fig. S13 High resolution XPS spectra of (a)  $\text{Co}_{2p}$ , (b)  $\text{Ni}_{2p}$ , (c)  $\text{Fe}_{2p}$  and (d)  $\text{O}_{1s}$  of CoNiFeLDH after electrocatalysis.

Table S6 Binding energy of the XPS peaks for Co, Ni, O in CoNiFeLDH after electrocatalysis compared with the reported earlier.<sup>5,6.</sup>

| Sample    | Deconvoluted Co          | Observed binding energy (eV) before OER (Table S2) | Observed binding energy (eV) post OER | Reported binding energy (eV) |
|-----------|--------------------------|----------------------------------------------------|---------------------------------------|------------------------------|
| CoNiFeLDH | Co <sup>3+</sup> (2p3/2) | 780.7                                              | 780.2                                 | 780.6                        |
|           | Co <sup>2+</sup> (2p3/2) | 782.2                                              | 781.9                                 | 782.3                        |
|           | Co <sup>3+</sup> (2p1/2) | 796.5                                              | 795.5                                 | 796.4                        |
|           | Co <sup>2+</sup> (2p1/2) | 797.7                                              | 797.0                                 | 797.7                        |

| Sample    | Deconvoluted Ni          | Observed binding energy (eV) before OER (Table S2) | Observed binding energy (eV) post OER | Reported binding energy (eV) |
|-----------|--------------------------|----------------------------------------------------|---------------------------------------|------------------------------|
| CoNiFeLDH | Ni <sup>2+</sup> (2p3/2) | 856.2                                              | 856.0                                 | 855.9                        |
|           | Ni <sup>2+</sup> (2p1/2) | 873.6                                              | 874.1                                 | 873.4                        |

| Sample    | Deconvoluted Fe          | Observed binding energy (eV) before OER (Table S2) | Observed binding energy (eV) post OER | Reported binding energy (eV) |
|-----------|--------------------------|----------------------------------------------------|---------------------------------------|------------------------------|
| CoNiFeLDH | Fe <sup>2+</sup> (2p3/2) | 711.2                                              | 711.1                                 | 711.0                        |
|           | Fe <sup>3+</sup> (2p3/2) | 713.4                                              | 714.2                                 | 713.2                        |
|           | Fe <sup>2+</sup> (2p1/2) | 725.4                                              | 725.0                                 | 724.5                        |

| Sample    | Deconvoluted O    | Observed binding energy (eV) before OER (Table S2) | Observed binding energy (eV) post OER | Reported binding energy (eV) |
|-----------|-------------------|----------------------------------------------------|---------------------------------------|------------------------------|
| CoNiFeLDH | O1s (Lattice O)   | 531.1                                              | 530.4                                 | 529.5                        |
|           | O1s (Adsorbed OH) | 531.8                                              | 531.5                                 | 531.5                        |
|           | Surface O-C=O     | 532.8                                              | 532.8                                 | 532.7                        |

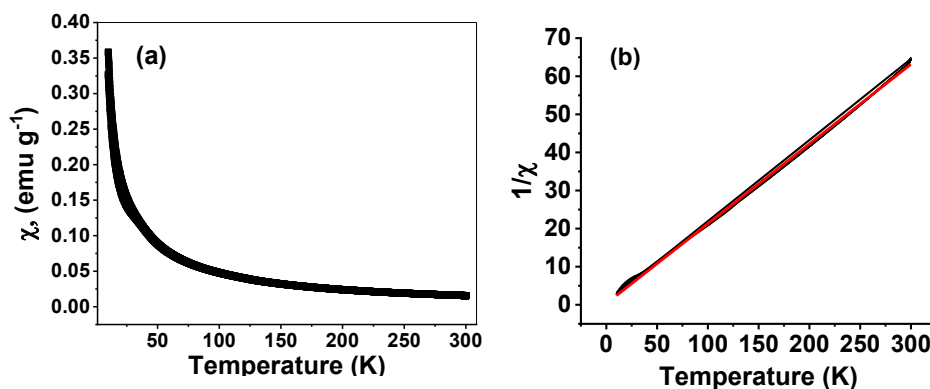

Fig. S14 (a) Zero-field-cooling (ZFC) temperature-dependent magnetic susceptibility of CoNiFeLDH and (b) A plot of  $1/\chi$  vs.  $T$  to determine inverse magnetic susceptibility. The red solid line is a fit to the susceptibility data to the Curie–Weiss law.

### **Calculation of magnetic moment and number of unpaired electrons to determine spin state:<sup>7</sup>**

A linear fitting of  $1/\chi$  vs.  $T$  in Fig. S14 enabled to obtain the slope as  $1/C$  following the Curie–Weiss equation as:

$$\chi^{-1} = (T - \theta_{CW})/C = T/C - \theta_{CW}/C$$

where  $\chi$ ,  $C$  and  $\theta_{CW}$  are the magnetic susceptibility, Curie constant and Curie–Weiss temperature, respectively.

Using  $C$  (Curie constant) the effective magnetic moment in  $\mu_{eff} = \sqrt{(8C)} \mu_B$ , can be determined and following number of unpaired electrons were found by  $\mu_{eff} = \sqrt{n(n+2)} \mu_B$  where  $n$  is number of unpaired electrons and  $\mu_B$  is Bohr magneton.

From the slope of the linear fitting in Fig X was found to be  $C$  is  $4.76 \text{ emu K g}^{-1}$

Applying  $\mu_{eff} = \sqrt{(8C)} \mu_B$ ,

$$\mu_{eff} = 6.17 \mu_B$$

$$\mu_{eff} = \sqrt{[n(n+2)]} \mu_B$$

$$(6.17)^2 = n(n+2)$$

$$38.07 = n^2 + 2n$$

Rearrange the equation into a quadratic form:

$$n^2 + 2n - 38.07 = 0$$

Solve for  $n$  using the quadratic formula

$$n = [-b \pm \sqrt{(b^2 - 4ac)}] / 2a$$

In this case,  $a = 1$ ,  $b = 2$ , and  $c = -38.07$ .

$$n = [-2 \pm \sqrt{(2^2 - 4 \times 1 \times -38.07)}] / (2 \times 1)$$

$$n = [-2 \pm \sqrt{(4 + 152.28)}] / 2$$

$$n = [-2 \pm \sqrt{(156.28)}] / 2$$

$$n = [-2 \pm 12.50] / 2$$

Calculate the two possible values for n:  $n_1 = (-2 + 12.50) / 2 = 10.50 / 2 = 5.25$

$$n_2 = (-2 - 12.50) / 2 = -14.50 / 2 = -7.25$$

Therefore, an effective magnetic moment of  $6.17 \mu_B$  corresponds to approximately 5 unpaired electrons and hence proved that  $\text{Fe}^{3+}$  is present in high spin ( $t_{2g}^3 e_g^2$ ).

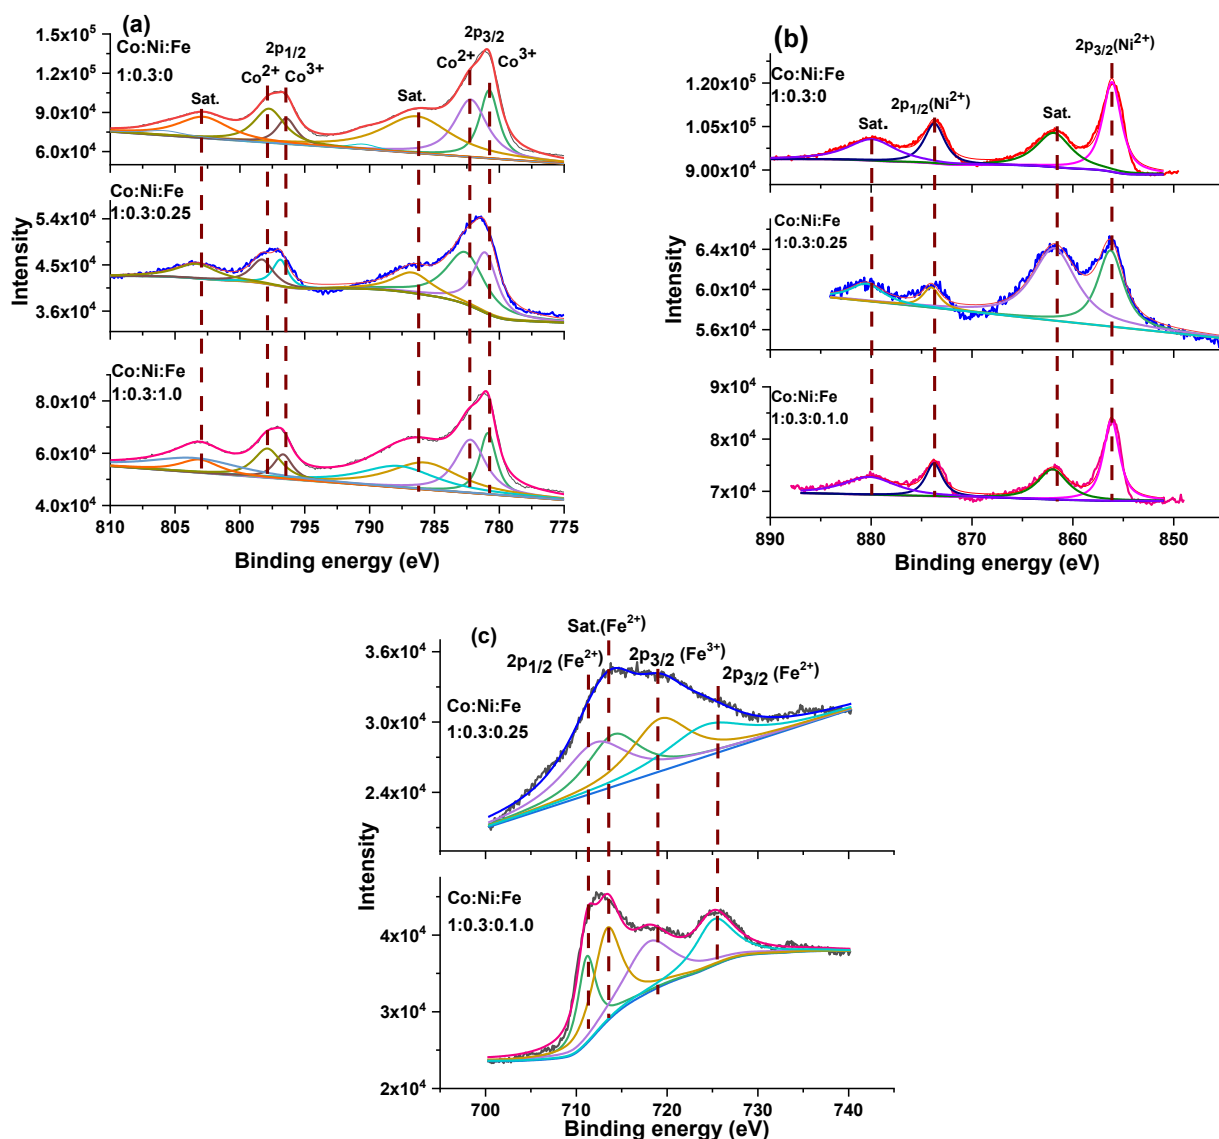

Fig. S15 High resolution XPS analysis of (a) Co<sub>2p</sub>, (b) Ni<sub>2p</sub> and (c) Fe<sub>2p</sub> of CoNiFex (x=0, 0.25, 1) varying iron concentration.

#### Discussion on the change transfer in CoNiFeLDH during OER.

It has been already found that oxidation states of Co (Co<sup>2+</sup>, Co<sup>3+</sup>) and Ni (Ni<sup>2+</sup>) was identical for Co:Ni:Fe = 1.00:0.30:0.00 (CoNi hydroxide) and Co:Ni:Fe = 1.00:0.30:1.00 (CoNiFeLDH). We carried out another XPS analysis of Co:Ni:Fe = 1.00:0.30:0.25 to compare the oxidation state of metal ions varying iron contents in Fig. S15 and explore the impact of the low concentration of Fe (Fe=0.25) in the metal hydroxide. The high resolution XPS of Co(2p<sub>1/2</sub>, 2p<sub>3/2</sub>) in Co:Ni:Fe = 1.00:0.30:0.25 showed small shift towards higher binding energy of 0.3 eV compared to other two compositions, this can be due to local change in electronic environments around metal centre for inclusion of Fe. However, the XPS scan for Ni<sub>2p</sub> and Fe<sub>2p</sub> were identical for three compositions (CoNiFex (x=0, 0.25, 1)). Comparing the XPS analysis of all three materials, it can be unveiled that that added iron in the material has insignificant role to alter oxidation of other co-existing metal centers in the synthesis stage. Hence, the XPS experiment also supports the concept of redox chemistry where it is known that varying iron contents in same oxidation states in metal hydroxides was not effective to the change the



oxidation states of the co-existing metal ions except the minor change in the electronic properties of metal centers around it. It is to be noted that the importance of the facile charge transfer in Fe-O-Ni and Fe-O-Co units due to the suitable oxidation states of the metal ions of CoNiFeLDH (Fig. 6) in the context of OER was already proposed. Accordingly, the crystal field theory with a schematic and the evidence from the literature reports were used to explain the enhanced OER kinetics.<sup>4,8,9</sup> Simultaneously, it has been seen that OER activity was gradually improved with increased concentration of Fe from CoNi hydroxide to CoNiFeLDH in Fig. S6. Therefore, the enhanced OER activity can be rationalized by the greater number of the charge transfer possibilities with the increased iron concentration when the material is present at the electrode-electrolyte interface under the influence of oxidation potential in OER.

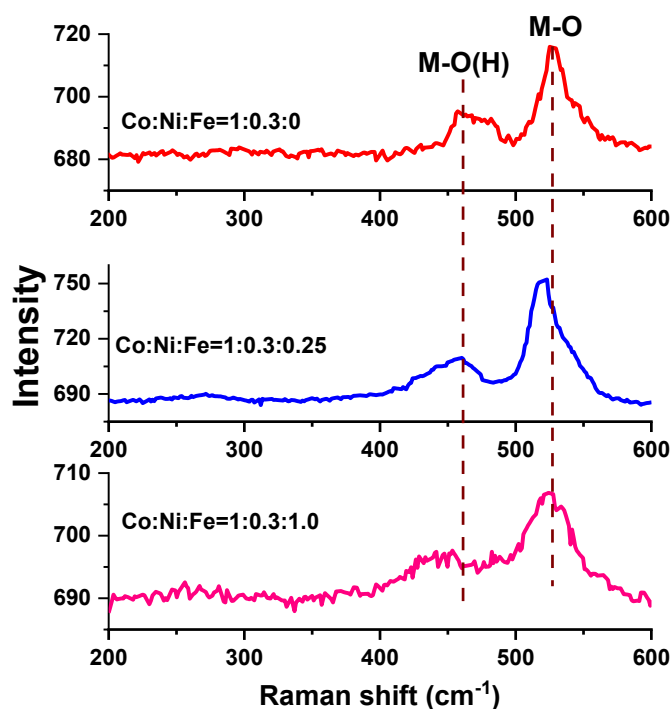

Fig. S16 Raman analysis for CoNiFex (x=0, 0.25, 1) varying iron concentration.

Raman analysis has been carried for all three compositions of different iron contents for Co:Ni:Fe =1.00 :0.30:0.00, Co:Ni:Fe =1.00:0.30:0.25 and Co:Ni:Fe =1.00:0.30: 1.00. We witnessed the shifting of peak position of M-O bond to lower wave number on increasing the Fe concentration from Co:Ni:Fe =1.00 :0.30:0.00 (CoNi hydroxide) to Co:Ni:Fex (x=0.25, 1) although there was no significant shift observed between the Fe containing metal hydroxides. The shifting was found to be from  $527\text{ cm}^{-1}$  to  $520 \pm 1\text{ cm}^{-1}$ .<sup>10</sup> This is due to the phonon softening arising from the tensile strain developed in metal hydroxides with the added  $\text{Fe}^{3+}$  of smaller ionic radii compared to  $\text{Co}^{2+}$  and  $\text{Ni}^{2+}$  ions. It resulted in the elongation M-O bonds. In addition, the appearance of the broad peak around  $458\text{ cm}^{-1}$  indicated the existence of the defects of all metal hydroxides.<sup>11</sup> The broadness is most prominent in case of highest iron content among three samples which is evident for lattice strain that also supported the evolution of LDH in the x-ray diffraction analysis. The lattice strain could make additional contribution for enhanced OER due to efficient adsorption of oxygenated intermediate as evidenced by Liu et al.<sup>12</sup>

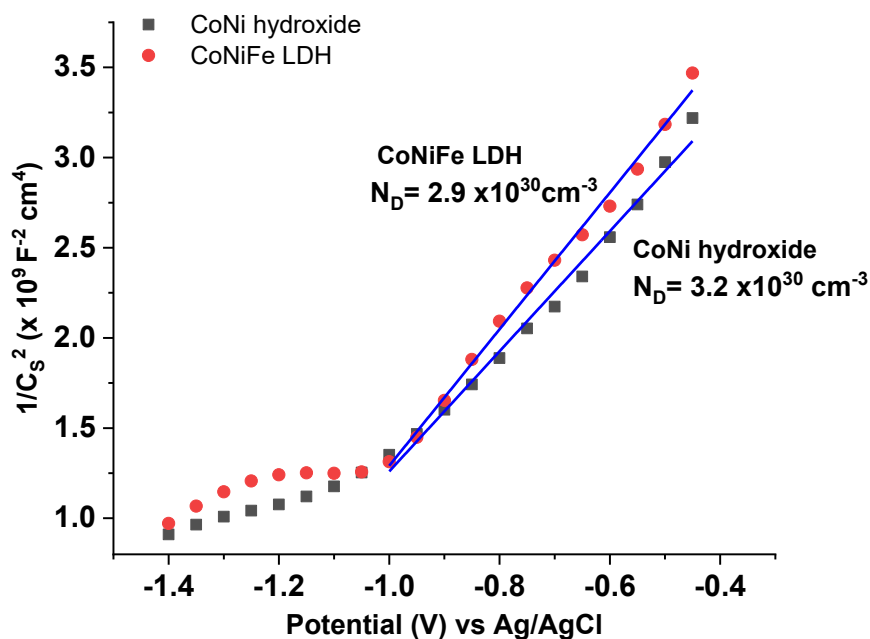

Fig. S17 Mott–Schottky plots of CoNi hydroxide and CoNiFe LDH.

#### Calculation of charge carrier density ( $N_D$ ) from Mott–Schottky plots

$$N_D = 2 / (q\epsilon\epsilon_0 \times \text{slope})$$

Where  $q$  indicates the electronic charge ( $1.602 \times 10^{-19}$  C),  $\epsilon$  being the dielectric constant ( $\epsilon \sim 3.6$ )<sup>2</sup>,  $\epsilon_0$  is the vacuum permittivity ( $8.854 \times 10^{-14}$  F cm<sup>-1</sup>) and the slope is obtained from  $1/C_s^2$  vs potential (V) vs /Ag/AgCl plots.

$$\begin{aligned} N_D (\text{CoNi hydroxide}) &= 2 / (1.602 \times 10^{-19} \text{ C} \times (3.6)^2 \times 8.854 \times 10^{-14} \times 3.3) \\ &= 3.20 \times 10^{30} \text{ cm}^{-3} \end{aligned}$$

$$\begin{aligned} N_D (\text{CoNiFe LDH}) &= 2 / (1.602 \times 10^{-19} \text{ C} \times (3.6)^2 \times 8.854 \times 10^{-14} \times 3.7) \\ &= 2.90 \times 10^{30} \text{ cm}^{-3} \end{aligned}$$

Table S7 Comparisons of the different synthetic protocols of Co, Ni and Fe based LDH catalysts with the previous reports.

| Sl  | Trimetallic LDH                                         | Synthesis process                                             | Synthesis temperature    | Synthesis time          | Ref.                                                        |
|-----|---------------------------------------------------------|---------------------------------------------------------------|--------------------------|-------------------------|-------------------------------------------------------------|
| 1.  | <i>CoNiFeLDH</i>                                        | <i>Coprecipitation</i>                                        | <i>Room temperature</i>  | <i>24 h</i>             | <i>Our work</i>                                             |
| 2.  | NiCoFe-LDH Nanosheets                                   | Hydrothermal                                                  | 100 °C                   | Overnight               | <i>ACS Catal.</i> , 2020, <b>10</b> , 5179                  |
| 3.  | NiCoFe-LDH/N-Doped Graphene Oxide                       | Coprecipitation                                               | Room temperature         | 24 h                    | <i>Adv. Energy Mater.</i> , 2017, <b>8</b> 1701905          |
| 4.  | Ternary NiFeCo metal compound                           | Corrosion reaction using Ni foam                              | 90 °C                    | 12 h                    | <i>Appl. Catal. B</i> , 2021, <b>294</b> , 120246           |
| 5.  | Defect-Rich Ternary NiCoFe LDH                          | Electrodeposition On Ni foam                                  | Room temperature         | -                       | <i>Chem. Eur. J</i> , 2022, <b>28</b> , e202103601          |
| 6.  | Cobalt-promoted formation of oxygen vacancy in NiFe LDH | Hydrothermal                                                  | 120 °C                   | 24 h                    | <i>J. Power Sources</i> , 2021, <b>506</b> , 230097         |
| 7.  | Superhydrophilic cobalt-doped NiFe LDH                  | Hydrothermal                                                  | 120 °C                   | 12 h                    | <i>Int. J. Hydrog. Energy</i> , 2024, <b>80</b> , 11        |
| 8.  | Co <sub>3</sub> S <sub>4</sub> @NiFe-LDH                | Electrodeposition On Co <sub>3</sub> S <sub>4</sub> nanosheet | Room temperature         | 200s                    | <i>ACS Appl. Mater. Interfaces</i> , 2024, <b>16</b> , 8751 |
| 9.  | Layered NiFeCo Double Hydroxide Nanosheets              | Hydrothermal                                                  | 120 °C                   | 12 h                    | <i>ACS Appl. Nano Mater.</i> 2024, <b>7</b> , 13308         |
| 10. | NiCoFe-layered hydroxide grown on graphene oxide        | (i) coprecipitation<br>(ii) hydrothermal                      | (i) 60 °C<br>(ii) 120 °C | (i) 30 min<br>(ii) 24 h | <i>New J. Chem.</i> , 2024, <b>48</b> , 10739               |
| 11. | An amorphous trimetallic (Ni–Co–Fe) hydroxide           | Hydrothermal                                                  | 180 °C                   | 6h                      | <i>J. Mater. Chem. A</i> , 2020, <b>8</b> , 5601            |
| 12. | NiFe LDH Nanosheets Anchored on Cobalt Nanocrystal      | Hydrothermal                                                  | 100 °C                   | 6h                      | <i>ACS Appl. NanoMater.</i> , 2022, <b>5</b> , 13047        |
| 13. | NiFeCo LDHQDs-modified NiCoP nanoarray                  | (i)Hydrothermal<br>(ii)coprecipitation                        | (i) 120 °C<br>(ii) 80 °C | 8h<br>-                 | <i>Inorg. Chem. Front.</i> , 2024, <b>11</b> , 4794         |
| 14. | NiFeCo-LDH nanosheets supercapacitor                    | Hydrothermal                                                  | 160 °C                   | 4h                      | <i>J. Mater. Chem. A</i> , 2024, <b>12</b> , 2887           |
| 15. | NiCoFeLDH                                               | hydrothermal                                                  | 95 °C                    | 8h                      | <i>Int. J. Hydrog. Energy</i> , 2022, <b>47</b> , 23644     |
| 16. | Ternary NiCoFe-LDH hollow polyhedrons                   | Templating with metal-organic framework (ZIF-67)              | Room temperature         | 1h                      | <i>J. Energy Chem.</i> , 2020, <b>43</b> , 104              |
| 17. | Hierarchical trimetallic LDH nanosheets                 | Templating with metal-organic framework                       | Room temperature         | 10 min                  | <i>Appl. Catal. B</i> , 2020, <b>264</b> , 118532           |
| 18. | FeCoNi LDH                                              | Templating with metal-organic framework (ZIF-67)              | Room temperature         | 6h                      | <i>Adv. Energy Mater.</i> , 2021 <b>23</b> , 2102141        |
| 19. | Metal–Organic Framework-Derived Trimetallic NiCoFe-LDH  | Templating with metal-organic framework                       | Ambient temperature      | 6h                      | <i>ACS SustainableChem.Eng.</i> 2022, <b>10</b> , 14693     |
| 20. | Ni-Co-Fe Hydr(oxy)oxide@Ni-Co LDH                       | Templating with metal-organic framework (ZIF-67)              | 92 °C                    | 15 min                  | <i>Angew. Chem. Int. Ed.</i> , 2022, <b>61</b> , e202213049 |

## References:

1. M. Gao, W. Sheng, Z. Zhuang, Q. Fang, S. Gu, J. Jiang and Y. Yan, *J. Am. Chem. Soc.* 2014, **136**, 7077–7084.
2. S. Roy, R. Madhu, K. Bera, S. Nagappan, H. Dhandapani, A. De and S. Kundu, *ACS Appl. Mater. Interfaces*, 2024, **16**, 5965–5976.
3. C. McCrory, S. Jung, I. Ferrer, S. Chatman, J. Peters and T. Jaramillo, *J. Am. Chem. Soc.* 2015, **137**, 4347–4357.
4. S. Deka, M. Jaiswal, P. Rajput and B. Choudhury, *J. Mater. Chem. A*, 2024, **12**, 9532–9545.
5. J. Song, B. Zhao, Y. Huang, Y. Qin, J. Zhou, W. Song and Y. Sun, *RSC Adv.*, 2017, **7**, 2745–2752.
6. A. Bovas and T. Radhakrishnan, *J. Mater. Chem. A*, 2024, **12**, 24872–24877.
7. X. Xua and J. Guan, *Chem. Sci.*, 2024, **15**, 14585–14607.
8. M. Liu, K. Min, B. Han and L. Lee, *Adv. Energy Mater.*, 2021, **11**, 2101281.
9. J. Jiang, F. Sun, S. Zhou, W. Hu, H. Zhang, J. Dong, Z. Jiang, J. Zhao, J. Li, W. Yan and M. Wang, *Nat. Commun.*, 2018, **9**, 2885.
10. S. Liu, Y. Zhang, L. Hao, A. Nsabimana, S. Shen, *J. Colloid Interface Sci.*, 2025, **678**, 924–933.
11. B. Lee, S. Jung, G. Yu, H. Kim, J. Kwon, K. Kim, J. Kwak, W. Lee, D. Mok, S. Back and Y. Kim, *ACS Catal.*, 2025, **15**, 1123–1134.
12. D. Zhou, S. Wang, Y. Jia, X. Xiong, H. Yang, S. Liu, J. Tang, J. Zhang, D. Liu, L. Zheng, Y. Kuang, X. Sun and B. Liu, *Angew. Chem. Int. Ed.*, 2019, **58**, 736–740.
